# Supplementary material for: Insights into size-segregated distribution of benzothiazoles in indoor aerosol from office environments
Source: Royal Society of Chemistry journal article supplement (doi:10.1039/d4ea00031e), 2024-01-01
Supplement: d4ea00031e1.pdf [file d4ea00031e1.pdf]

# **Rubber-derived particles in size-segregated indoor air: unveiling their presence through benzothiazoles**

Matteo Feltracco<sup>a\*</sup>, Giovanna Mazzi<sup>a</sup>, Elena Barbaro<sup>b,a</sup>, Elena Gregoris<sup>b,a</sup>, Mara Bortolini<sup>a</sup>, Carlo Barbante<sup>b,a</sup>,  
Andrea Gambaro<sup>a,b</sup>

<sup>a</sup> Department of Environmental Sciences, Informatics and Statistics, Ca' Foscari University of Venice, Via  
Torino, 155 - 30172 Venice Mestre (VE), Italy

<sup>b</sup> Institute of Polar Sciences, National Research Council (CNR-ISP), Via Torino, 155 - 30172 Venice Mestre  
(VE), Italy

\* Corresponding author: Matteo Feltracco – [matteo.feltracco@unive.it](mailto:matteo.feltracco@unive.it)

## **Supplementary Materials**

### **Materials and methods – 2**

### **Figures - 2**

### **Tables – 3**

## Materials and methods

Ultra-grade methanol (MeOH) was purchased from VWR® (Radnor, PA, USA) and ultrapure water (18.2 MΩ-cm, 1 ppb TOC) was produced using a Purelab Ultra System (Elga®, High-Wycombe, UK). Benzothiazole (BTH), 2-amino-benzothiazole (BTH-NH<sub>2</sub>), 2-methyl-benzothiazole (BTH-Me), 2-methylthio-benzothiazole (BTH-MeS), 2-mercapto-benzothiazole (BTH-SH) were purchased from Sigma Aldrich (Darmstadt, Germany), 2-hydroxy-benzothiazole (BTH-OH) and 2-thiocyanomethylthio-benzothiazole (BTH-SCNMeS) were purchased from LCG Standards (Teddington, UK), 2-benzothiazole-sulfonic acid (BTH-SO<sub>3</sub>H) was purchased from BLD Pharm (Kaiserslautern, Germany). All used material was previously decontaminated with MeOH and ultrapure water.

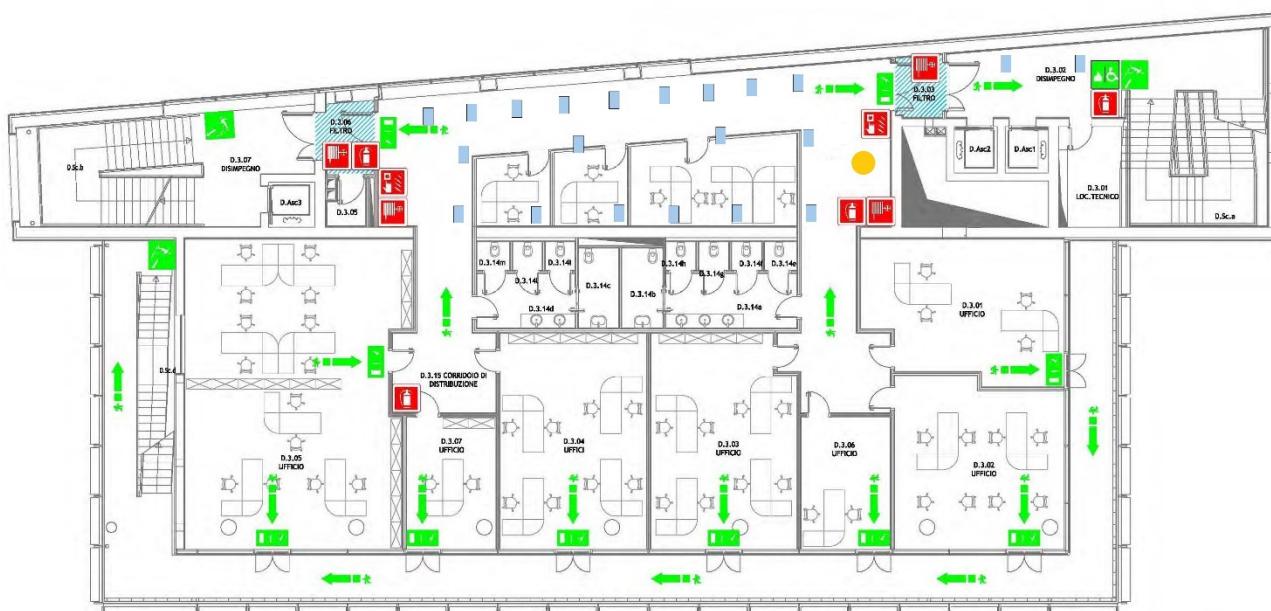

**Figure S1.** Indoor sampling location. The sampling site is shown with the orange dot, the ventilation units are reported with light blue boxes.

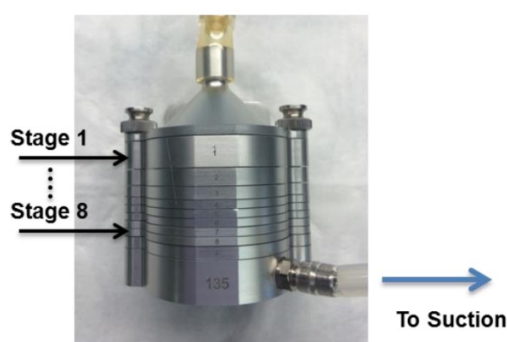

**Figure S2.** Mini-MOUDI™ 135-6 impactor.

**Table S1.** Sample parameters.

|                  | Volume (m <sup>3</sup> ) | Sample time  |
|------------------|--------------------------|--------------|
| 13/11 – 17/11/23 | 11.56312                 | 96 h 32 min  |
| 17/11 – 22/11/23 | 13.13001                 | 109 h 43 min |
| 22/11 – 30/11/23 | 23.56525                 | 196 h 57 min |
| 01/12 – 11/12/23 | 29.21277                 | 244 h 9 min  |

**Table S2.** TSP, PM<sub>10</sub> and PM<sub>1</sub> mean concentrations.

| TSP              | BTH-NH <sub>2</sub> | BTH-SH | BTH  | BTH-OH | BTH-Me | BTH-SCNMeS | BTH-MeS | BTH-SO <sub>3</sub> H |
|------------------|---------------------|--------|------|--------|--------|------------|---------|-----------------------|
| 13 – 17/11       | 0.004               | 0.8    | 0.6  | 0.2    | 0.02   | 0.0014     | 0.2     | 1                     |
| 17 – 22/11       | 0.005               | 1.1    | 0.8  | 1.0    | 0.03   | 0.0010     | 0.5     | 2                     |
| 22 – 30/11       | 0.005               | 0.8    | 0.3  | 0.5    | 0.01   | 0.0010     | 0.3     | 3                     |
| 01 – 11/12       | 0.002               | 0.2    | 0.1  | 0.2    | 0.01   | 0.0004     | 0.2     | 1                     |
| media            | 0.004               | 0.8    | 0.5  | 0.6    | 0.02   | 0.0010     | 0.3     | 2                     |
| DEV.ST           | 0.002               | 0.4    | 0.3  | 0.4    | 0.01   | 0.0004     | 0.1     | 1                     |
| PM <sub>10</sub> |                     |        |      |        |        |            |         |                       |
| 13 – 17/11       | 0.004               | 0.7    | 0.5  | 0.4    | 0.02   | 0.0014     | 0.2     | 1                     |
| 17 – 22/11       | 0.004               | 0.8    | 0.4  | 0.8    | 0.03   | 0.0004     | 0.3     | 1                     |
| 22 – 30/11       | 0.005               | 0.7    | 0.3  | 0.4    | 0.004  | 0.0010     | 0.3     | 3                     |
| 01 – 11/12       | 0.002               | 0.2    | 0.1  | 0.1    | 0.01   | 0.0004     | 0.1     | 1                     |
| media            | 0.004               | 0.6    | 0.3  | 0.5    | 0.02   | 0.0008     | 0.2     | 2                     |
| DEV.ST           | 0.002               | 0.3    | 0.2  | 0.3    | 0.01   | 0.0005     | 0.1     | 1                     |
| PM <sub>1</sub>  |                     |        |      |        |        |            |         |                       |
| 13 – 17/11       | 0.004               | 0.5    | 0.2  | 0.3    | 0.02   | 0.0014     | 0.1     | 1                     |
| 17 – 22/11       | 0.004               | 0.5    | 0.2  | 0.7    | 0.02   | 0.0004     | 0.2     | 1                     |
| 22 – 30/11       | 0.005               | 0.7    | 0.3  | 0.3    | 0.002  | 0.0010     | 0.2     | 3                     |
| 01 – 11/12       | 0.002               | 0.1    | 0.03 | 0.1    | 0.005  | 0.0004     | 0.1     | 1                     |
| media            | 0.004               | 0.5    | 0.2  | 0.4    | 0.01   | 0.0008     | 0.2     | 2                     |
| DEV.ST           | 0.002               | 0.2    | 0.1  | 0.2    | 0.01   | 0.0005     | 0.1     | 1                     |
